# Supplementary material for: Highly efficient sunlight-driven photo-adsorptive degradation of organic pollutants by green synthesized Z-scheme heterojunction CeO2@ZnO nanocomposite
Source: Royal Society of Chemistry journal article supplement (doi:10.1039/d3en00558e), 2023-11-13
Supplement: d3en00558e1.pdf [file d3en00558e1.pdf]

## Supporting information

### Statistical analysis

Sigma Plot Systat was used for graphs plotting in the kinetics study and statistical treatments of the experimental data for the elimination of selected pesticides by nanohybrid were represented empirically from an asymptotic analysis. The good acceptance of the outcome was shown for the triplicate and the “Microsoft Excel” program was used for the calculation of the standard deviation. The significance of experimental data was proved by comparing the results through beta coefficient ( $R^2$ ) and probability values (p-values). Fit equations were used for kinetics and adsorption data.

### Details of Langmuir, Freundlich, Temkin, Sip and D-R isotherms used in present study

Adsorption data through Langmuir adsorption isotherms were calculated through graph of  $C_e/q_e$  v/s  $C_e$  of the solute. Which were calculated by fitting the adsorption data into the equation:

$$\frac{C_e}{q_e} = \frac{1}{k_L X_m} + \frac{C_e}{X_m}$$

or

$$\frac{1}{q_e} = \frac{1}{C_e} \left( \frac{1}{k_L X_m} \right) + \frac{1}{X_m}$$

$q_e$  was calculated through the equation:

$$q_e = \frac{(C_i - C_e) \times \text{Volume of solution (mL)} \times \text{Molecular weight of adsorbent}}{\text{Amount of catalyst (mg)}}$$

### Freundlich Isotherm.

A typical graph of  $Q_e$  v/s  $C_e$  of the solute was a straight line.

$$Q_e = K_f + C_e^{1/n} \text{ and linear form is } \log Q_e = \log K_f + \frac{1}{n} \log C_e$$

Where  $C_e$  is the equilibrium concentration of the dye solution;  $Q_e$  is the amount of dye adsorbed per gram weight of adsorbent;  $K_f$  is the Freundlich adsorption constant (mg/g);  $n$  is adsorption intensity.

### Temkin Isotherm:

$$q_e = \frac{RT}{b} \ln A + \frac{RT}{b} \ln C_e$$

Where  $B=RT/b$  constant related to heat of sorption (J/mol) obtained from the Temkin plot ( $q_e$  vs  $\ln C_e$ );  $A$  (slope) = Temkin isotherm equilibrium binding constant (L/g);  $b$  (intercept) = Temkin isotherm constant;  $R$  = universal gas constant (8.314 J·mol<sup>-1</sup>·K<sup>-1</sup>)  $T$  = Temperature at 298, 308 and 318 K.

As  $C_e$  values were very low, the  $\ln C_e$  values were coming out to be negative. Therefore, Temkin isotherm ( $Q_e$  v/s  $\ln C_e$ ) was not plotted for present study.

### Dubinin-Radushkevich (D-R) isotherm:

$$\ln q_e = \ln X_m - \beta \varepsilon^2$$

$$\varepsilon = RT \ln \left[ 1 + \frac{1}{C_e} \right]$$

Where  $X_m$  is maximum adsorption capacity (mg/g) obtained from intercept;  $\beta$  (mol<sup>2</sup>/J<sup>2</sup>) is a activity coefficient constant related to sorption energy and obtained from slope;  $\varepsilon$  is Polanyi potential. D-R was plotted between  $\ln q_e$  vs  $\varepsilon^2$

### Sips Isotherm

It is plotted between  $1/Q_e \times 10^{-2}$  (g/mg) and  $(1/C_e) \times 10^{-8}$  L/mg; where  $(1/mg)$  and  $(mg/g)$  are the Sips equilibrium constant and maximum adsorption capacity values obtained from the slope and the intercept of the plot. The Sips isotherm equation is characterized by the dimensionless heterogeneity factor 'n' which can also be employed to describe the system's heterogeneity when is between 0 and 1.

$$\frac{1}{q_e} = \frac{1}{X_m K_s} \left( \frac{1}{C_e} \right)^{1/n} + \frac{1}{X_m}$$

### Equation used for calculation Band Gap Energy values

The band gap energy was determined by fitting the reflectance data into the direct transition equation

$$(\alpha h\nu)^2 = A(h\nu - E_g)$$

; where  $A$  is a constant,  $E_g$  is the energy gap,  $\nu$  is the frequency of incident radiation,  $h$  is Planck's constant,  $\alpha$  is the optical absorption coefficient and exponent 2 is the number characterizing the direct transition process. Plotting  $(\alpha h\nu)^2$  as a function of photon energy as shown in figure 3S, upon extrapolating the linear portion of the curve to absorption equal to zero gives the value of the band gap energy.

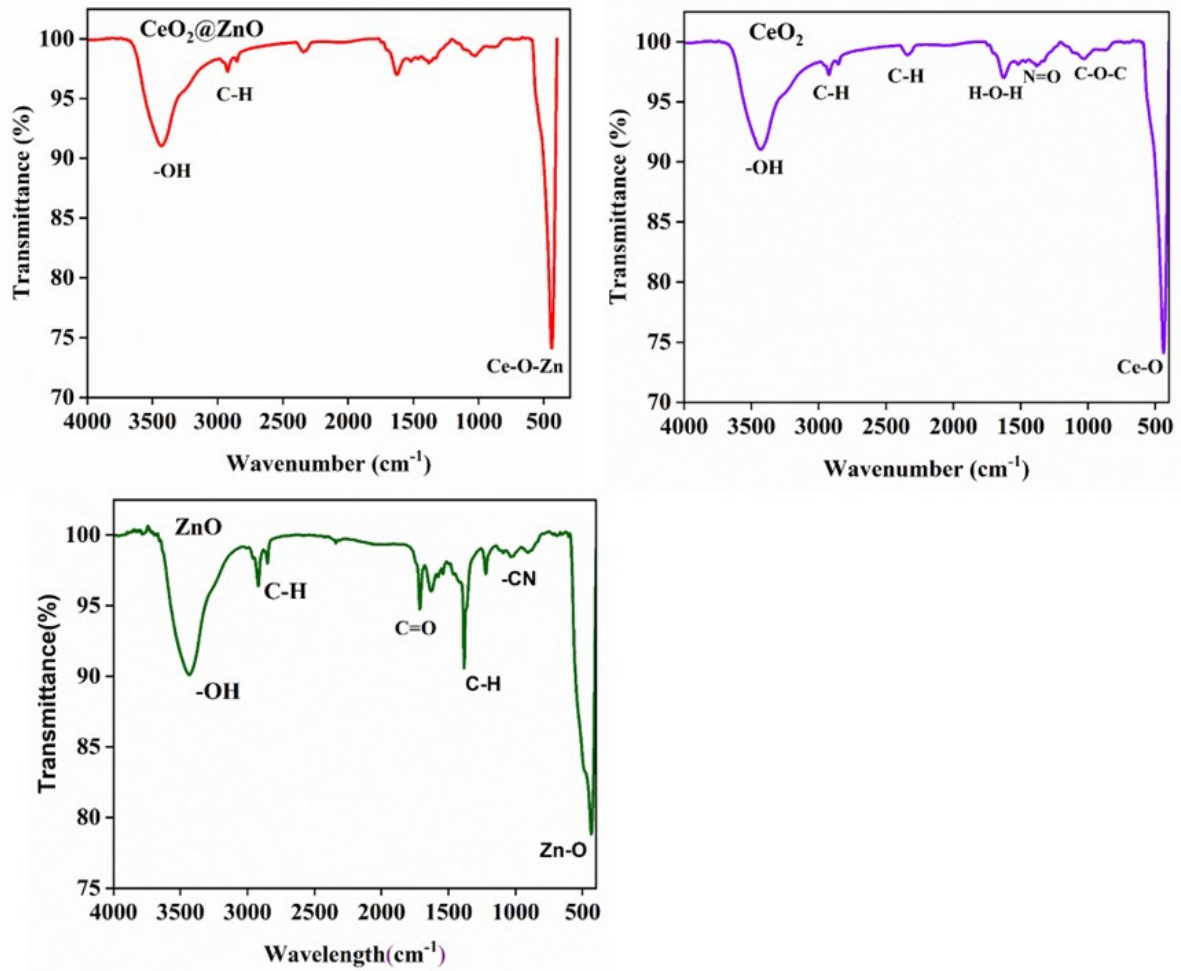

Figure 1S. FT-IR of (a) ZnO (b) CeO<sub>2</sub> (c) CeO<sub>2</sub>@ZnO nanocomposite ZnO, CeO<sub>2</sub> and CeO<sub>2</sub>@ZnO.

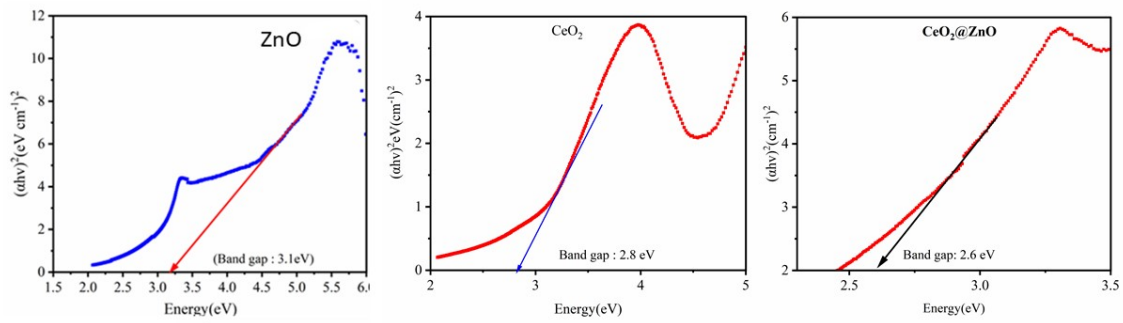

Figure 2S. Band gap of (a) ZnO (b) CeO<sub>2</sub> (c) CeO<sub>2</sub>@ZnO nanocomposite

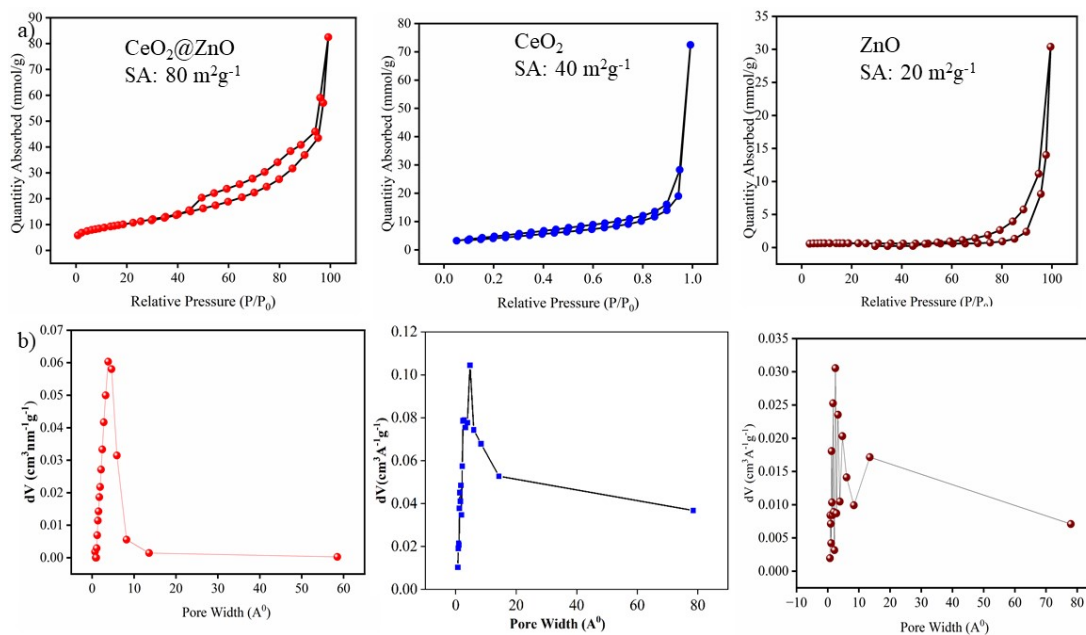

Figure 3S. (a)  $N_2$  adsorption/desorption isotherms and (b) pore size distribution curves of  $CeO_2@ZnO$  nanocomposite,  $CeO_2$  and  $ZnO$  nanoparticle

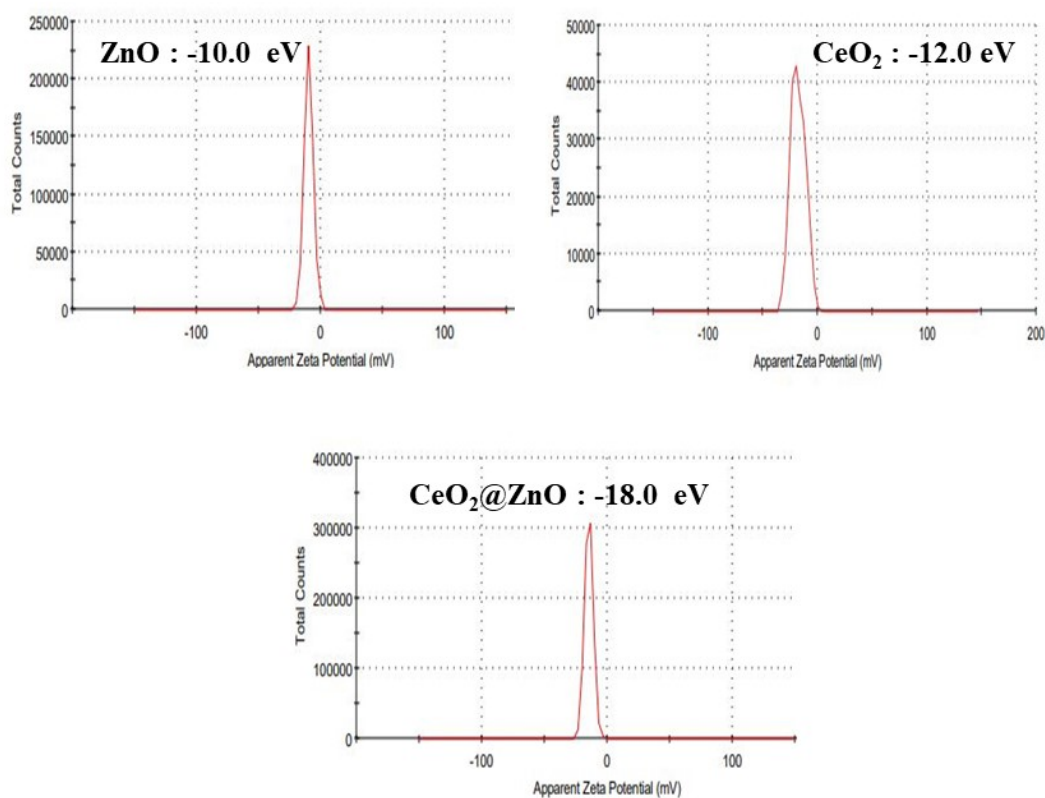

Figure 4S. Zeta potential of (a)  $ZnO$  (b)  $CeO_2$  (c)  $CeO_2@ZnO$  nanocomposite

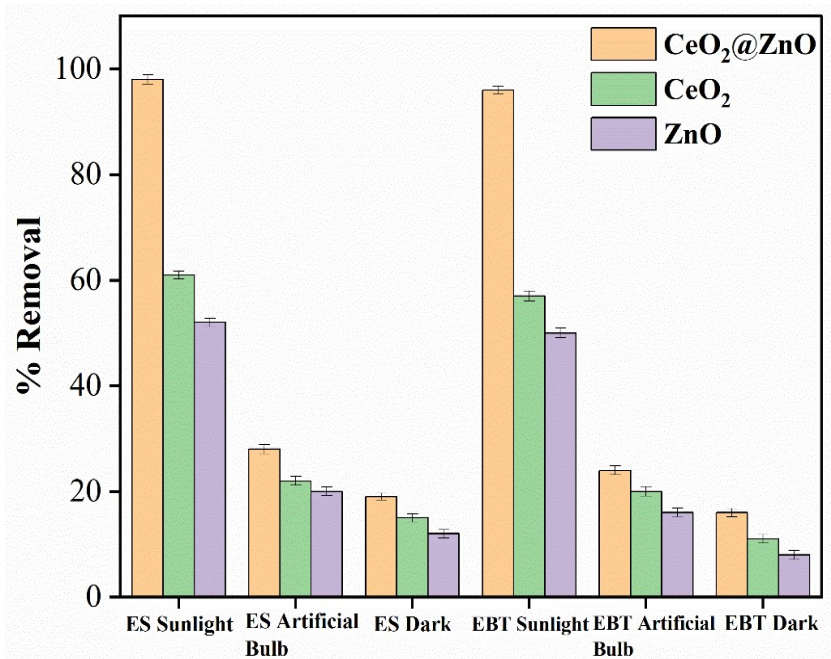

Figure 5S. Removal of ES and EBT under natural sunlight, bulb and dark

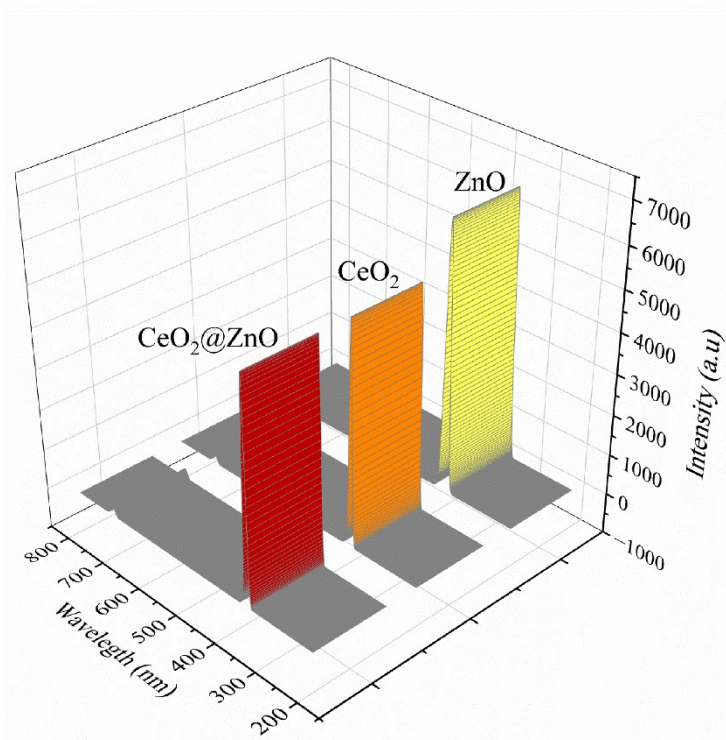

Figure 6S. photoluminescence (PL) of CeO<sub>2</sub>@ZnO nanocomposite and native nanoparticle CeO<sub>2</sub> as well as ZnO nanoparticle

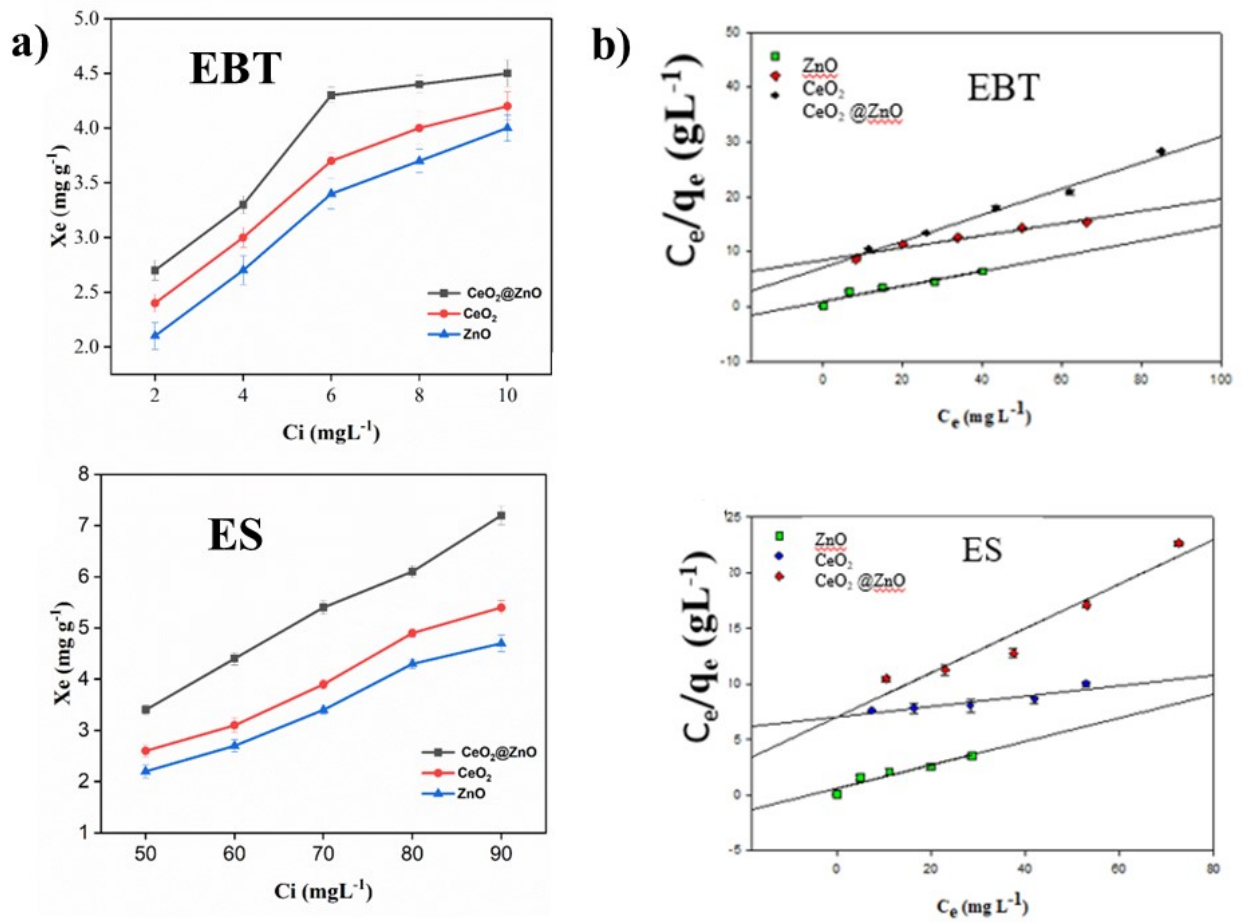

Figure 7S. (a) Adsorption and (b) Langmuir isotherms of EBT and ES adsorption upon the synthesized nanomaterials. Errors were estimated by taking triplicates of the sample.

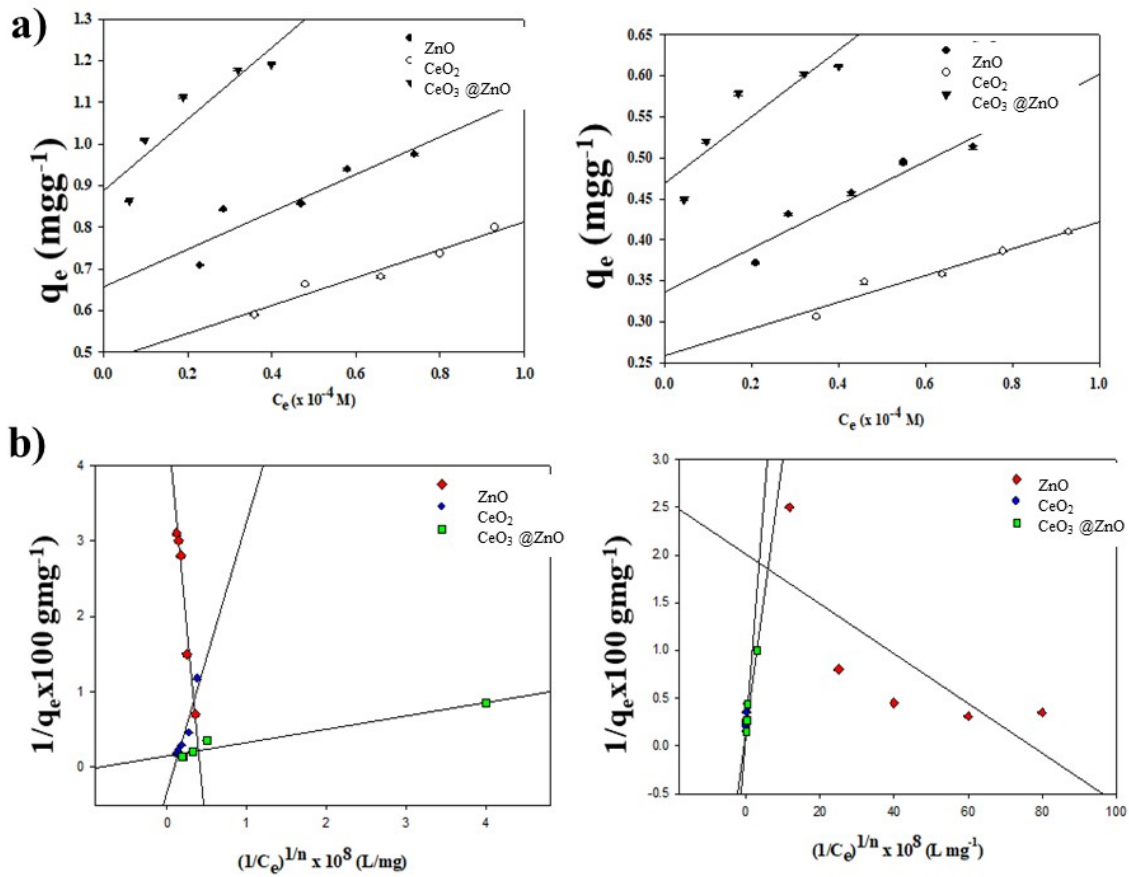

Figure 8S. (a) Freundlich (b) Sips model for targeted ES and EBT adsorption. Triplicate experiments (n=3) were evaluated for estimation of error bar.

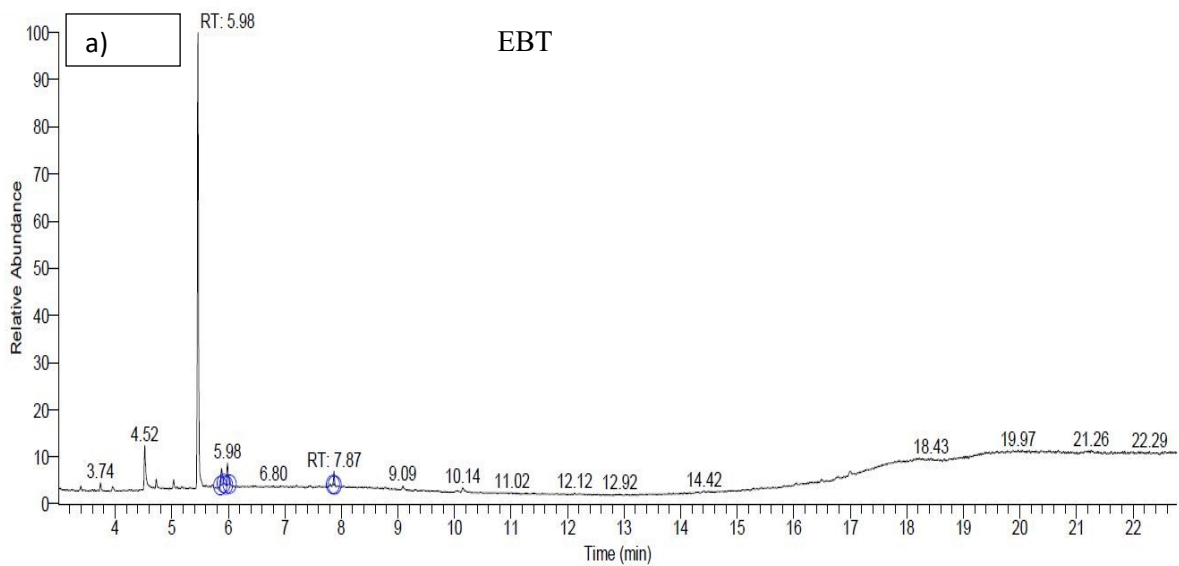



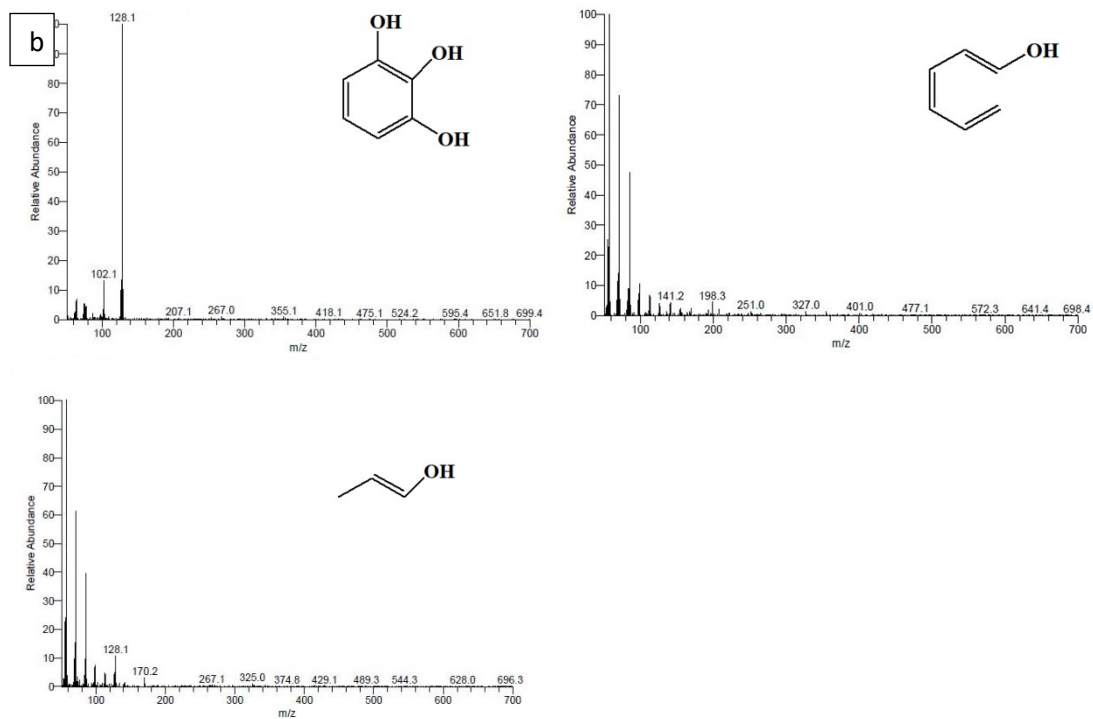

Figure 9S. (a) TIC and (b) mass spectra of EBT dye.

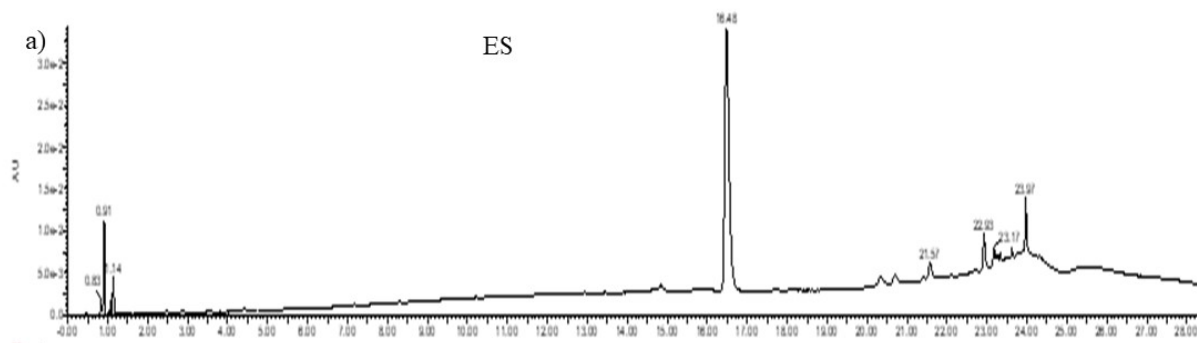



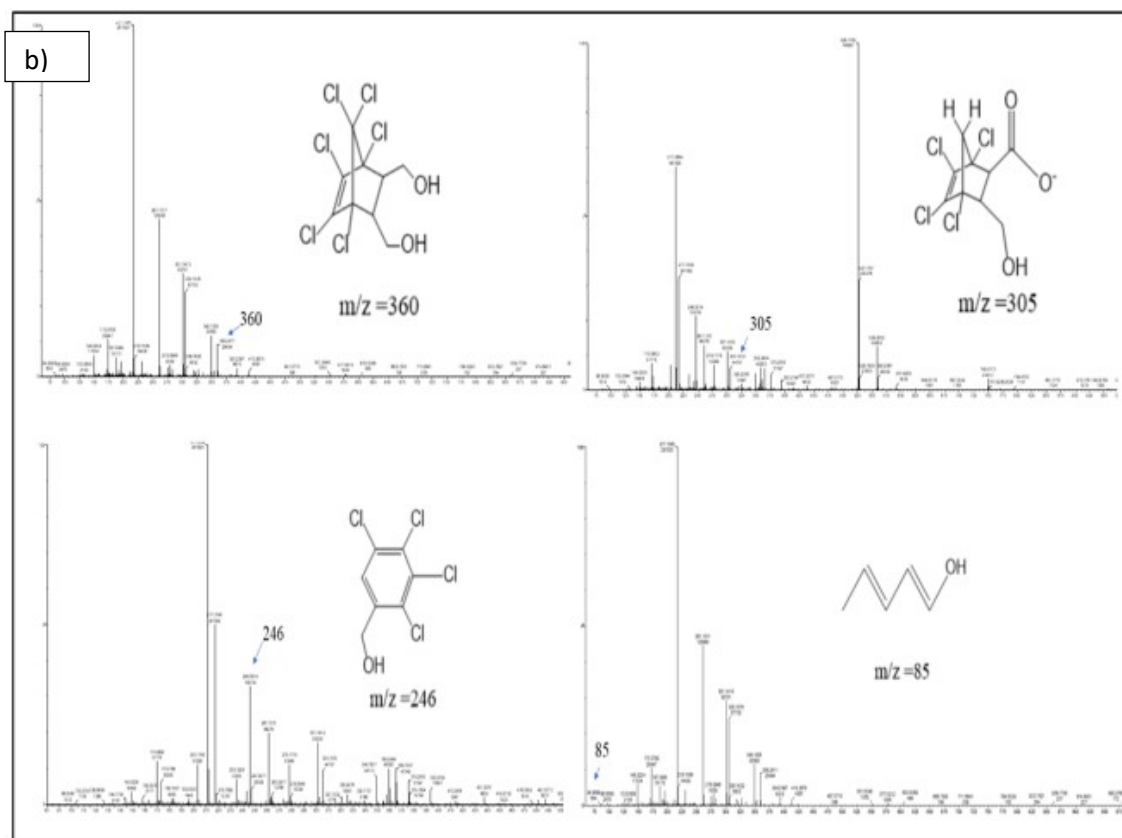

Figure 10S. (a) TIC and (b) mass spectra of ES pesticide

**Table 1S.** Comparison of different isotherms on the basis of  $R^2$  and  $p$  values for EBT and ES adsorption

|                            | Langmuir                |                       |                         |                       | Sips                    |                       |                         |                       |
|----------------------------|-------------------------|-----------------------|-------------------------|-----------------------|-------------------------|-----------------------|-------------------------|-----------------------|
|                            | EBT                     |                       | ES                      |                       | EBT                     |                       | ES                      |                       |
| <b>Catalyst</b>            | <b><math>R^2</math></b> | <b><math>p</math></b> | <b><math>R^2</math></b> | <b><math>p</math></b> | <b><math>R^2</math></b> | <b><math>p</math></b> | <b><math>R^2</math></b> | <b><math>p</math></b> |
| <b>CeO<sub>2</sub>@ZnO</b> | 0.99                    | 0.005                 | 0.98                    | 0.012                 | 0.86                    | 0.034                 | 0.85                    | 0.026                 |
| <b>CeO<sub>2</sub></b>     | 0.98                    | 0.004                 | 0.96                    | 0.015                 | 0.85                    | 0.025                 | 0.88                    | 0.035                 |
| <b>ZnO</b>                 | 0.99                    | 0.008                 | 0.99                    | 0.017                 | 0.87                    | 0.022                 | 0.89                    | 0.031                 |

  

| Freundlich |    |
|------------|----|
| EBT        | ES |

---

| <b>Catalyst</b>            | <b>R<sup>2</sup></b> | <b><i>p</i></b> | <b>R<sup>2</sup></b> | <b><i>p</i></b> |
|----------------------------|----------------------|-----------------|----------------------|-----------------|
| <b>CeO<sub>2</sub>@ZnO</b> | 0.82                 | 0.031           | 0.83                 | 0.032           |
| <b>CeO<sub>2</sub></b>     | 0.83                 | 0.022           | 0.85                 | 0.003           |
| <b>ZnO</b>                 | 0.88                 | 0.037           | 0.85                 | 0.002           |

---
